# Supplementary material for: Socioeconomic variation in the incidence of childhood coeliac disease in the UK
Source: PubMed Central journal article supplement — Arch Dis Child. 2015 Jan 22;100(5):466–73. doi: 10.1136/archdischild-2014-307105 (PMC4413865; doi:10.1136/archdischild-2014-307105), 2015-01-22
Supplement: archdischild-2014-307105-s1.pdf [file archdischild-2014-307105-s1.pdf]

**Supplementary table 1.** Sensitivity analysis 1: Incidence of coeliac disease excluding all patients whose first diagnosis or a gluten-free prescription was recorded within six months from their initial general practice registration (potentially prevalent cases) unless they were diagnosed at younger than 2 years of age ( $N=2,063,191$ )

|                                                               | Number of<br>coeliac disease<br>cases | Person-years | Rate per 100,000<br>person-years (95%<br>confidence interval) | Unadjusted<br>Incidence Rate<br>Ratios (95%<br>confidence interval) |
|---------------------------------------------------------------|---------------------------------------|--------------|---------------------------------------------------------------|---------------------------------------------------------------------|
| <b>Overall</b>                                                | 1,017                                 | 10,507,687   | 9.7 (9.1-10.3)                                                |                                                                     |
| <b>Sex</b>                                                    |                                       |              |                                                               |                                                                     |
| Male                                                          | 414                                   | 5,448,317    | 7.6 (6.9-8.3)                                                 | 1                                                                   |
| Female                                                        | 603                                   | 5,059,370    | 11.9 (11-12.9)                                                | 1.56 (1.38-1.77)                                                    |
| <b>Age (years)</b>                                            |                                       |              |                                                               |                                                                     |
| <1                                                            | 24                                    | 599,685      | 4.0 (2.7-6.0)                                                 |                                                                     |
| 1                                                             | 125                                   | 668,932      | 18.7 (15.7-22.2)                                              |                                                                     |
| 2                                                             | 85                                    | 662,566      | 12.8 (10.3-15.8)                                              |                                                                     |
| 3                                                             | 72                                    | 653,516      | 11.0 (8.7-13.9)                                               |                                                                     |
| 4                                                             | 72                                    | 643,040      | 11.2 (8.9-14.1)                                               |                                                                     |
| 5                                                             | 51                                    | 629,699      | 8.1 (6.1-10.6)                                                |                                                                     |
| 6                                                             | 62                                    | 618,185      | 10.0 (7.8-12.8)                                               |                                                                     |
| 7                                                             | 64                                    | 608,161      | 10.5 (8.2-13.4)                                               |                                                                     |
| 8                                                             | 51                                    | 597,726      | 8.5 (6.5-11.2)                                                |                                                                     |
| 9                                                             | 55                                    | 587,107      | 9.4 (7.2-12.2)                                                |                                                                     |
| 10                                                            | 48                                    | 576,614      | 8.3 (6.3-11.0)                                                |                                                                     |
| 11                                                            | 45                                    | 566,394      | 7.9 (5.9-10.7)                                                |                                                                     |
| 12                                                            | 45                                    | 554,263      | 8.1 (6.0-10.9)                                                |                                                                     |
| 13                                                            | 43                                    | 539,019      | 7.9 (5.9-10.7)                                                |                                                                     |
| 14                                                            | 50                                    | 521,469      | 9.6 (7.2-12.6)                                                |                                                                     |
| 15                                                            | 39                                    | 507,861      | 7.7 (5.6-10.5)                                                |                                                                     |
| 16                                                            | 33                                    | 495,520      | 6.6 (4.7-9.3)                                                 |                                                                     |
| 17                                                            | 53                                    | 477,930      | 11.0 (8.5-14.5)                                               |                                                                     |
| <b>Country</b>                                                |                                       |              |                                                               |                                                                     |
| England                                                       | 816                                   | 8,194,416    | 9.9 (9.3-10.6)                                                | 1                                                                   |
| Scotland                                                      | 120                                   | 1,286,845    | 9.3 (7.8-11.1)                                                | 0.93 (0.77-1.13)                                                    |
| Wales                                                         | 51                                    | 649,343      | 7.8 (5.9-10.3)                                                | 0.78 (0.59-1.04)                                                    |
| Northern Ireland                                              | 30                                    | 377,083      | 7.9 (5.5-11.4)                                                | 0.79 (0.55-1.15)                                                    |
| <b>Calendar period</b>                                        |                                       |              |                                                               |                                                                     |
| 1993-1997                                                     | 36                                    | 603,166      | 5.9 (4.3-8.3)                                                 | 1                                                                   |
| 1998-2002                                                     | 177                                   | 2,405,184    | 7.3 (6.3-8.5)                                                 | 1.23 (0.86-1.76)                                                    |
| 2003-2007                                                     | 322                                   | 3,572,601    | 9.0 (8.1-10.0)                                                | 1.51 (1.07-2.13)                                                    |
| 2008-2012                                                     | 482                                   | 3,926,736    | 12.3 (11.2-13.4)                                              | 2.05 (1.46-2.88)                                                    |
| <b>Socioeconomic deprivation (Quintile of Townsend Index)</b> |                                       |              |                                                               |                                                                     |
| 1 (least deprived)                                            | 286                                   | 2,479,455    | 11.5 (10.3-12.9)                                              | 1.66 (1.32-2.09)                                                    |
| 2                                                             | 239                                   | 2,032,624    | 11.7 (10.3-13.3)                                              | 1.70 (1.34-2.15)                                                    |
| 3                                                             | 180                                   | 2,043,890    | 8.8 (7.6-10.2)                                                | 1.27 (0.99-1.63)                                                    |
| 4                                                             | 152                                   | 1,901,254    | 7.9 (6.8-9.4)                                                 | 1.15 (0.89-1.49)                                                    |
| 5 (most deprived)                                             | 97                                    | 1,402,690    | 6.9 (5.7-8.4)                                                 | 1                                                                   |
| Missing                                                       | 63                                    | 648,773      | 9.7 (7.6-12.4)                                                | 1.40 (1.02-1.92)                                                    |

**Supplementary table 2.** Sensitivity analysis 2: Incidence of coeliac disease using a restricted definition of children with at least one prescription for a gluten-free product associated with their coeliac disease diagnosis ( $N=2,063,421$ )

|                                                               | Number of<br>coeliac<br>disease cases | Person-years | Rate per 100,000<br>person-years (95%<br>confidence interval) | Unadjusted<br>Incidence Rate<br>Ratios (95%<br>confidence interval) |
|---------------------------------------------------------------|---------------------------------------|--------------|---------------------------------------------------------------|---------------------------------------------------------------------|
| <b>Overall</b>                                                | 1,007                                 | 10,508,374   | 9.6 (9.0-10.2)                                                |                                                                     |
| <b>Sex</b>                                                    |                                       |              |                                                               |                                                                     |
| Male                                                          | 412                                   | 5,448,627    | 7.5 (6.8-8.3)                                                 | 1                                                                   |
| Female                                                        | 595                                   | 5,059,747    | 11.7 (10.8-12.7)                                              | 1.55 (1.37-1.76)                                                    |
| <b>Age (years)</b>                                            |                                       |              |                                                               |                                                                     |
| <1                                                            | 14                                    | 599,729      | 2.3 (1.4-3.9)                                                 |                                                                     |
| 1                                                             | 112                                   | 668,994      | 16.7 (13.9-20.1)                                              |                                                                     |
| 2                                                             | 96                                    | 662,631      | 14.5 (11.8-17.7)                                              |                                                                     |
| 3                                                             | 72                                    | 653,576      | 11.0 (8.7-13.8)                                               |                                                                     |
| 4                                                             | 71                                    | 643,093      | 11.0 (8.7-13.9)                                               |                                                                     |
| 5                                                             | 51                                    | 629,754      | 8.1 (6.1-10.6)                                                |                                                                     |
| 6                                                             | 70                                    | 618,239      | 11.3 (8.9-14.3)                                               |                                                                     |
| 7                                                             | 61                                    | 608,210      | 10.0 (7.8-12.9)                                               |                                                                     |
| 8                                                             | 56                                    | 597,771      | 9.3 (7.2-12.2)                                                |                                                                     |
| 9                                                             | 52                                    | 587,151      | 8.8 (6.7-11.6)                                                |                                                                     |
| 10                                                            | 53                                    | 576,655      | 9.1 (7.0-12.0)                                                |                                                                     |
| 11                                                            | 45                                    | 566,426      | 7.9 (5.9-10.6)                                                |                                                                     |
| 12                                                            | 49                                    | 554,290      | 8.8 (6.7-11.7)                                                |                                                                     |
| 13                                                            | 49                                    | 539,042      | 9.1 (6.9-12.0)                                                |                                                                     |
| 14                                                            | 45                                    | 521,483      | 8.6 (6.4-11.5)                                                |                                                                     |
| 15                                                            | 33                                    | 507,872      | 6.5 (4.6-9.1)                                                 |                                                                     |
| 16                                                            | 32                                    | 495,528      | 6.4 (4.5-9.1)                                                 |                                                                     |
| 17                                                            | 46                                    | 477,930      | 9.6 (7.2-12.8)                                                |                                                                     |
| <b>Country</b>                                                |                                       |              |                                                               |                                                                     |
| England                                                       | 796                                   | 8,194,945    | 9.7 (9.0-10.4)                                                | 1                                                                   |
| Scotland                                                      | 125                                   | 1,286,924    | 9.7 (8.1-11.6)                                                | 0.99 (0.83-1.20)                                                    |
| Wales                                                         | 55                                    | 649,399      | 8.5 (6.5-11.0)                                                | 0.87 (0.66-1.14)                                                    |
| Northern Ireland                                              | 31                                    | 377,106      | 8.2 (5.8-11.7)                                                | 0.84 (0.59-1.21)                                                    |
| <b>Calendar period</b>                                        |                                       |              |                                                               |                                                                     |
| 1993-1997                                                     | 39                                    | 603,213      | 6.5 (4.7-8.8)                                                 | 1                                                                   |
| 1998-2002                                                     | 171                                   | 2,405,398    | 7.1 (6.1-8.2)                                                 | 1.09 (0.77-1.55)                                                    |
| 2003-2007                                                     | 326                                   | 3,572,886    | 9.1 (8.1-10.1)                                                | 1.41 (1.01-1.97)                                                    |
| 2008-2012                                                     | 471                                   | 3,926,877    | 12.0 (10.9-13.1)                                              | 1.85 (1.34-2.57)                                                    |
| <b>Socioeconomic deprivation (Quintile of Townsend Index)</b> |                                       |              |                                                               |                                                                     |
| 1 (least deprived)                                            | 287                                   | 2,479,655    | 11.6 (10.3-13.0)                                              | 1.76 (1.39-2.23)                                                    |
| 2                                                             | 241                                   | 2,032,782    | 11.8 (10.4-13.4)                                              | 1.81 (1.42-2.30)                                                    |
| 3                                                             | 174                                   | 2,043,017    | 8.5 (7.3-9.9)                                                 | 1.29 (1.0-1.67)                                                     |
| 4                                                             | 157                                   | 1,901,385    | 8.2 (7.1-9.6)                                                 | 1.25 (0.97-1.62)                                                    |
| 5 (most deprived)                                             | 92                                    | 1,402,742    | 6.5 (5.3-8.0)                                                 | 1                                                                   |
| Missing                                                       | 56                                    | 648,793      | 8.6 (6.6-11.2)                                                | 1.31 (0.94-1.83)                                                    |
